# Supplementary material for: Recent Advances in Computer-Assisted Algorithms for Cell Subtype Identification of Cytometry Data
Source: PubMed Central journal article supplement (PMC7198724; doi:10.3389/fcell.2020.00234), 2020-04-28

cleanup

CD45+CD66b-  
(Lymphocytes, DCs,  
Monocytes)

CD45loCD66b+  
(Granulocytes)

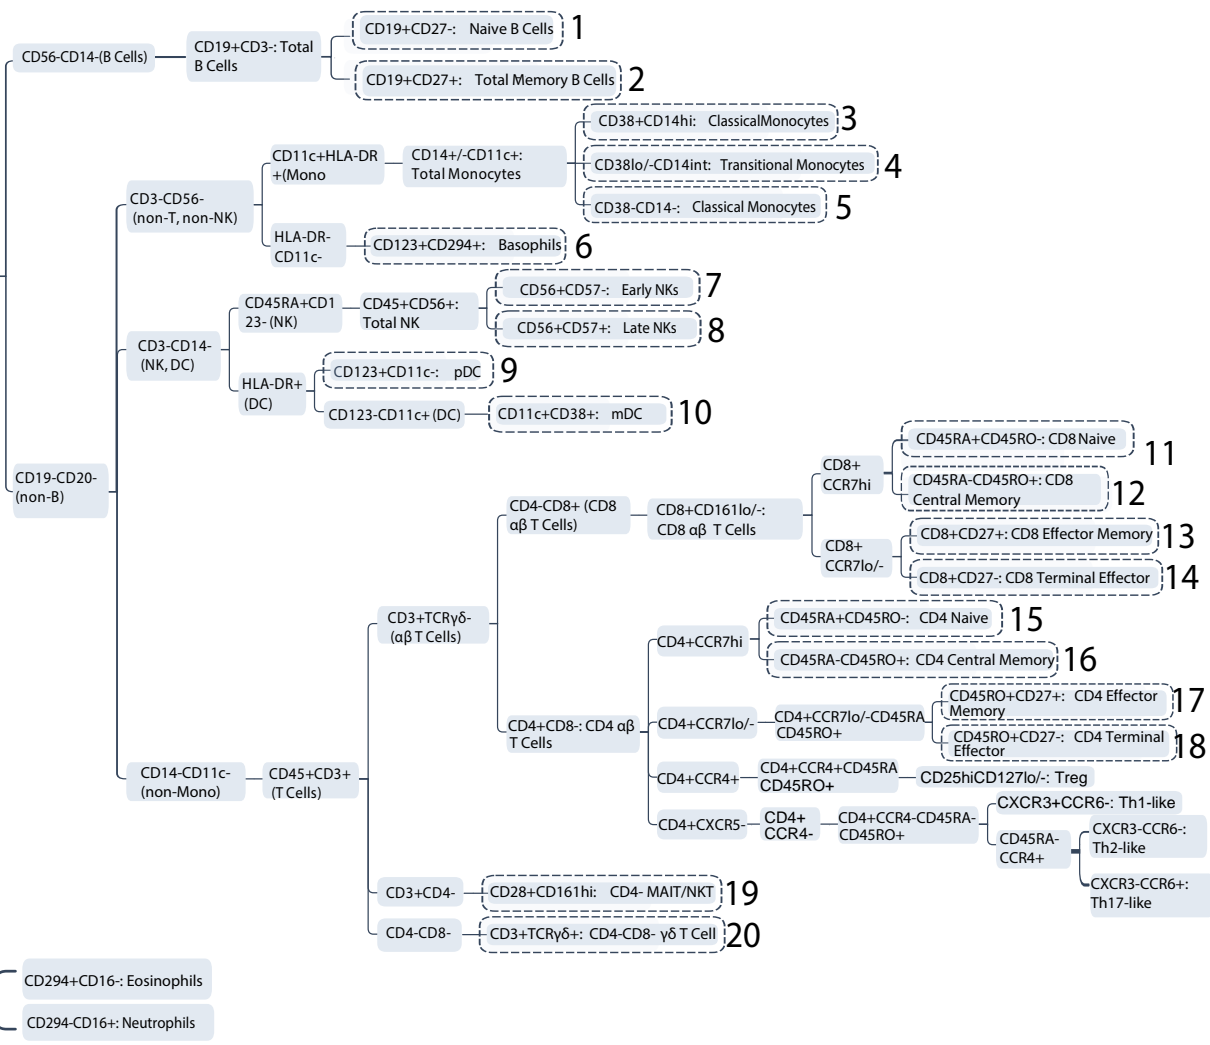

Supplement: Image_1.pdf [file Image_1.pdf]
