# Supplementary material for: Recent Advances in Computer-Assisted Algorithms for Cell Subtype Identification of Cytometry Data
Source: PubMed Central journal article supplement (PMC7198724; doi:10.3389/fcell.2020.00234), 2020-04-28

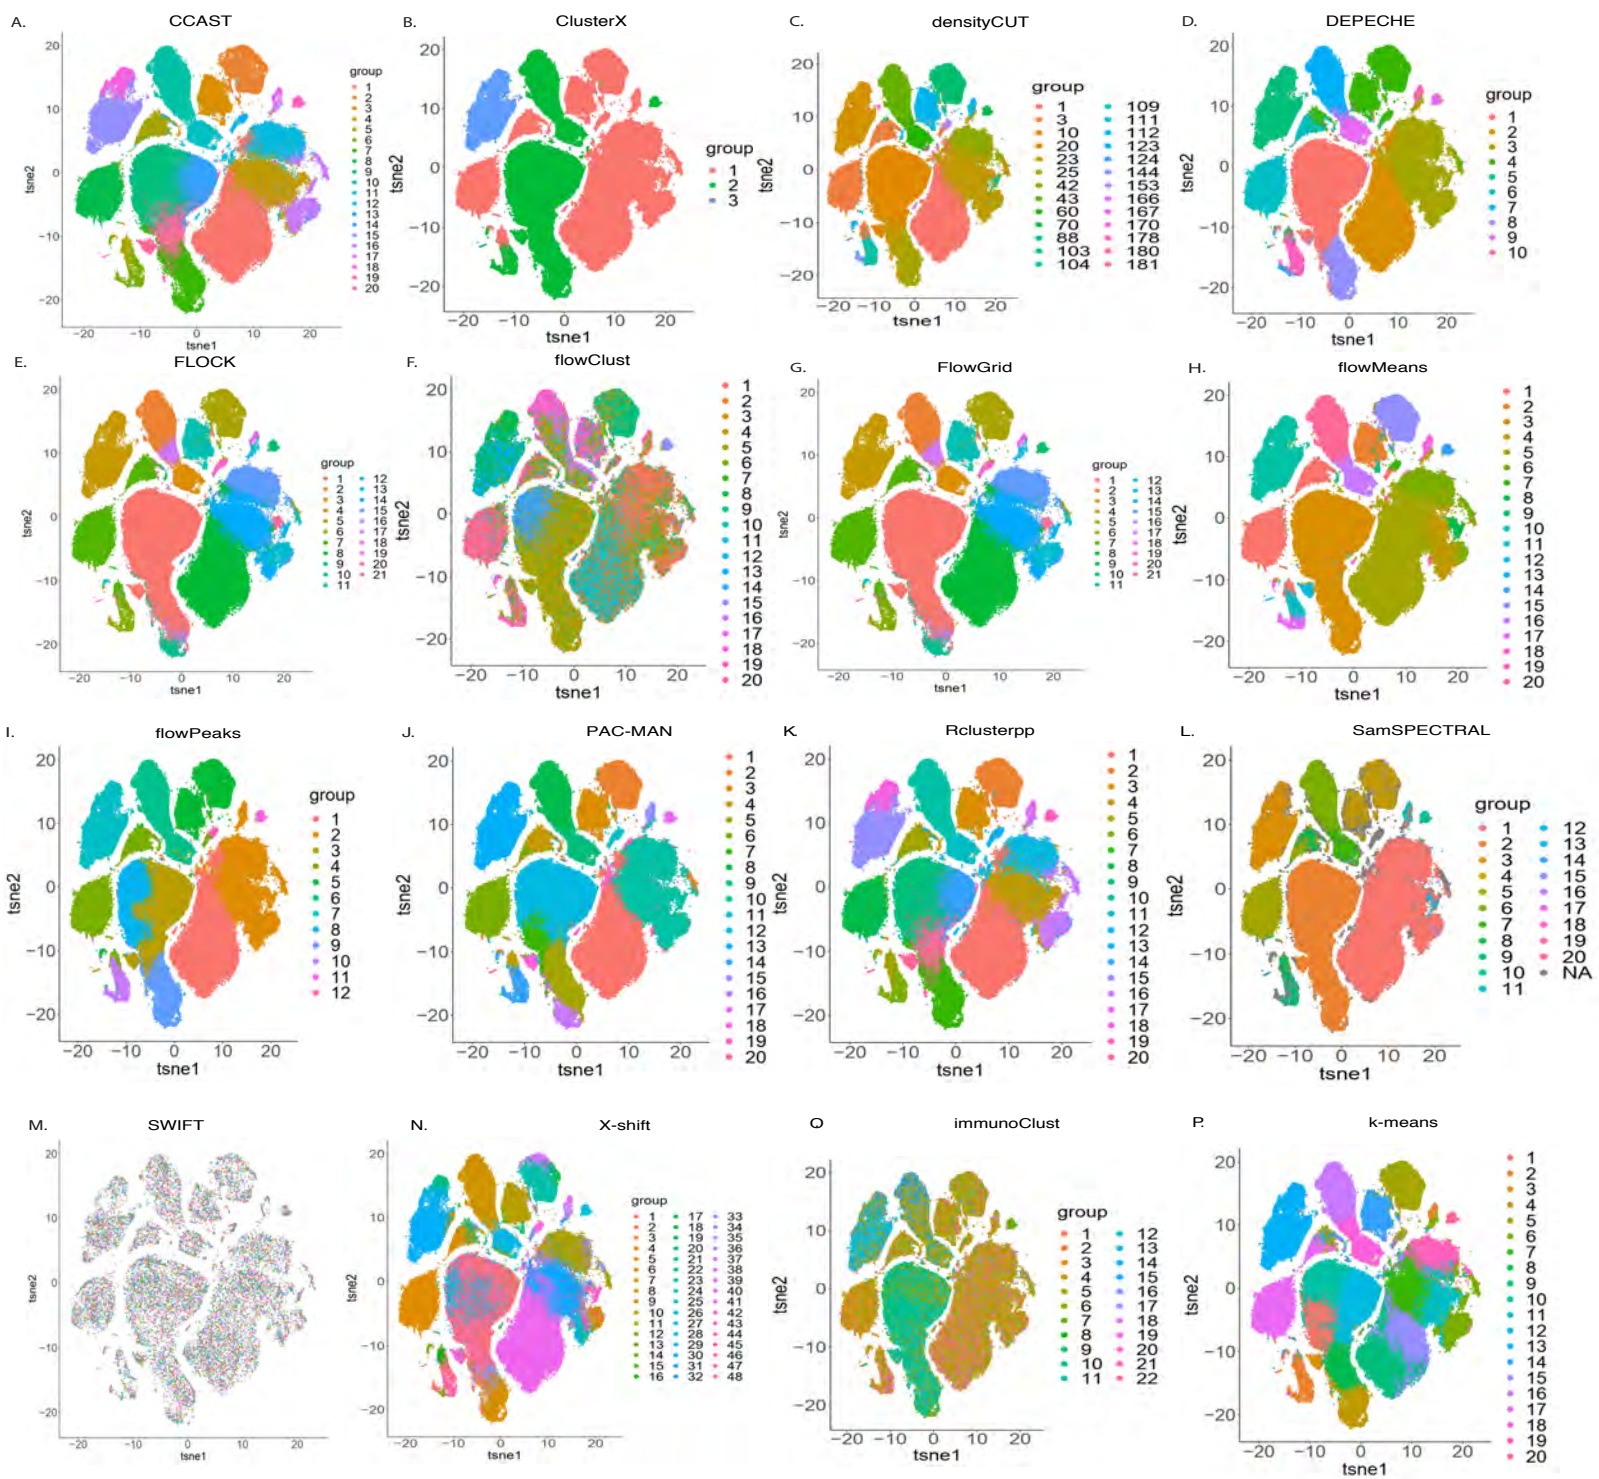

Supplement: Image_2.pdf [file Image_2.pdf]
